# Supplementary material for: Structural transition in orthorhombic Li5−xHxLa3Nb2O12 garnets induced by a concerted lithium and proton diffusion mechanism
Source: Royal Society of Chemistry journal article supplement (doi:10.1039/c7ta10431f), 2018-01-01
Supplement: c7ta10431f1.pdf [file c7ta10431f1.pdf]

## Supplementary Information

### Structural transition in orthorhombic $\text{Li}_{5-x}\text{H}_x\text{La}_3\text{Nb}_2\text{O}_{12}$ garnets induced by a concerted lithium and proton diffusion mechanism

*María Luisa Sanjuán,<sup>1\*</sup> Alodia Orera,<sup>1</sup> Isabel Sobrados,<sup>2</sup> Antonio F. Fuentes,<sup>3</sup> and Jesús Sanz<sup>2</sup>*

<sup>1</sup>Instituto de Ciencia de Materiales de Aragón (CSIC - Universidad de Zaragoza), Facultad de  
Ciencias, Universidad de Zaragoza, 50009 Zaragoza, Spain

<sup>2</sup>Instituto de Ciencia de Materiales de Madrid (CSIC), Cantoblanco, 28049 Madrid, Spain

<sup>3</sup>Cinvestav Unidad Saltillo, Apartado Postal 663, 25000 Saltillo, Coahuila, México

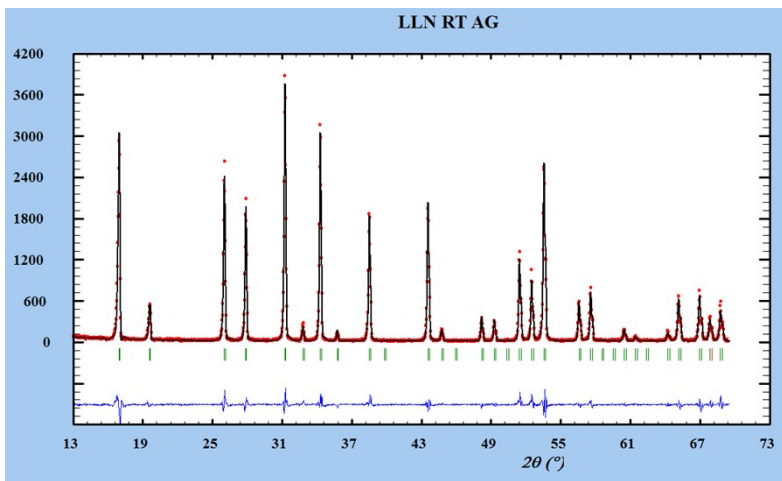

**Fig. S1:** Profile fit of the PXRD pattern of as-prepared  $\text{Li}_5\text{La}_3\text{Nb}_2\text{O}_{12}$  with S.G. Ia-3d (230),  $a=12.7967(3)$  Å.

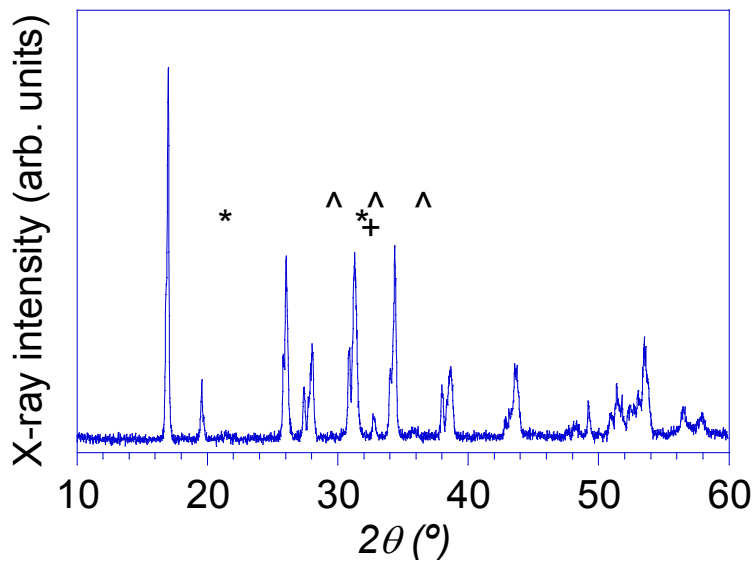

**Fig. S2:** XRD pattern of as-aged LLNO. The main peaks of possible Li-containing second phases are indicated with ^ ( $\text{LiOH}\cdot\text{H}_2\text{O}$ ), + ( $\text{LiOH}$ ) and \* ( $\text{Li}_2\text{CO}_3$ ).

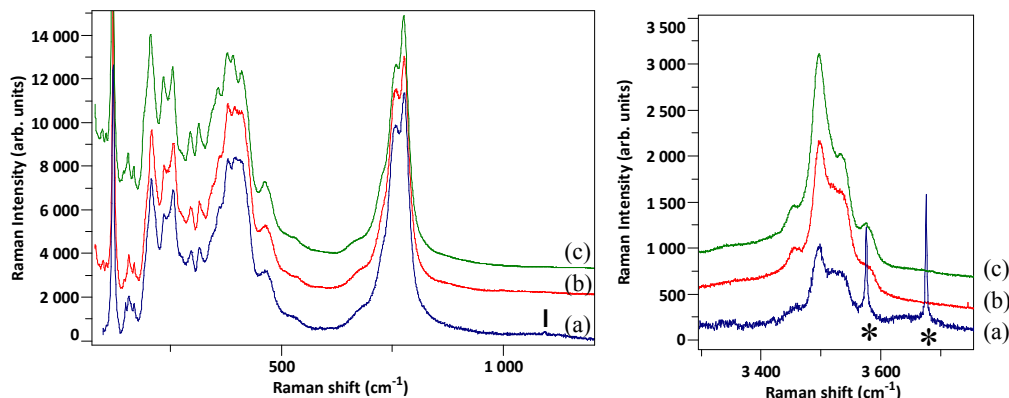

**Fig. S3.** Raman spectra of aged LLNO after successive preparation steps: (a) as aged; (b) after washing and (c) after 1h homogenization at 200 °C. The non-washed sample presents strong LiOH.H<sub>2</sub>O and LiOH bands (3575 and 3675 cm<sup>-1</sup>, resp., marked with \*), as well as a weak peak from Li<sub>2</sub>CO<sub>3</sub> at 1093 cm<sup>-1</sup> (marked with a bar). Washing suppresses these secondary phases without affecting the bands from the garnet phase (see section 3.4.1). The short annealing at 200 °C sharpens the bands and increases spectral resolution.

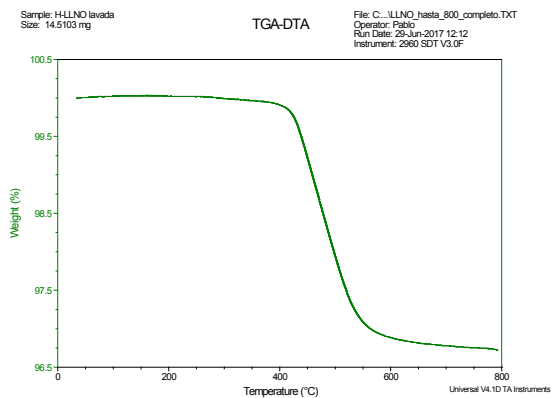

**Fig. S4:** TG curve of aged Li<sub>5</sub>La<sub>3</sub>Nb<sub>2</sub>O<sub>12</sub> after washing in distilled water to remove second-phases.

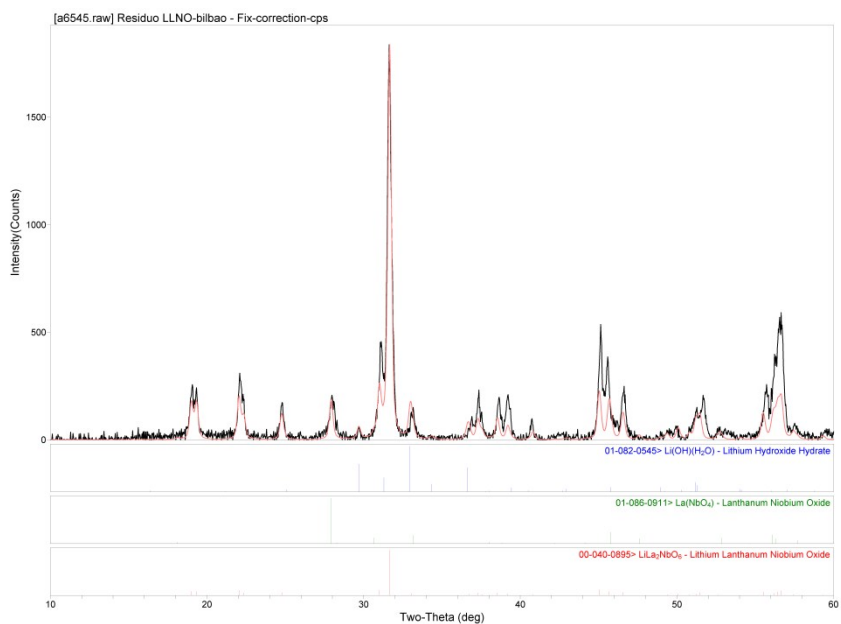

Materials Data, Inc.

[user] (MDIJADE7)

**Fig. S5:** XRD pattern and phase assignment of the TG residue of H-LLNO after 800 °C showing  $\text{LiLa}_2\text{NbO}_6$  and  $\text{LaNbO}_4$  as the main decomposition phases.

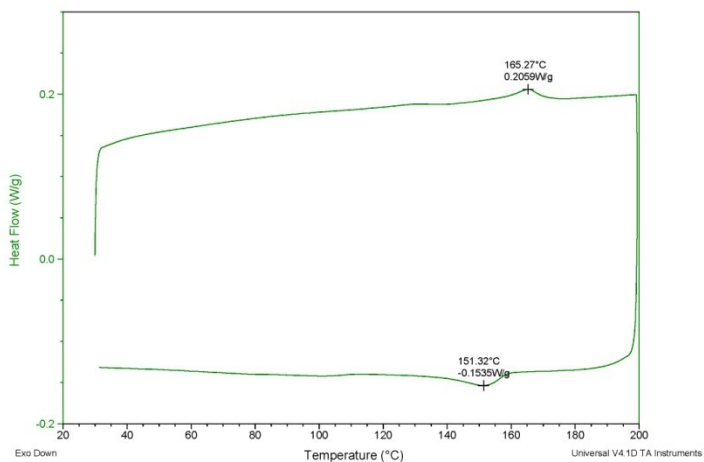

**Fig. S6:** DSC curve of H-LLNO between RT and 200 °C, displaying an endothermic event at 165 °C on heating and an exothermic one at 151 °C on cooling.

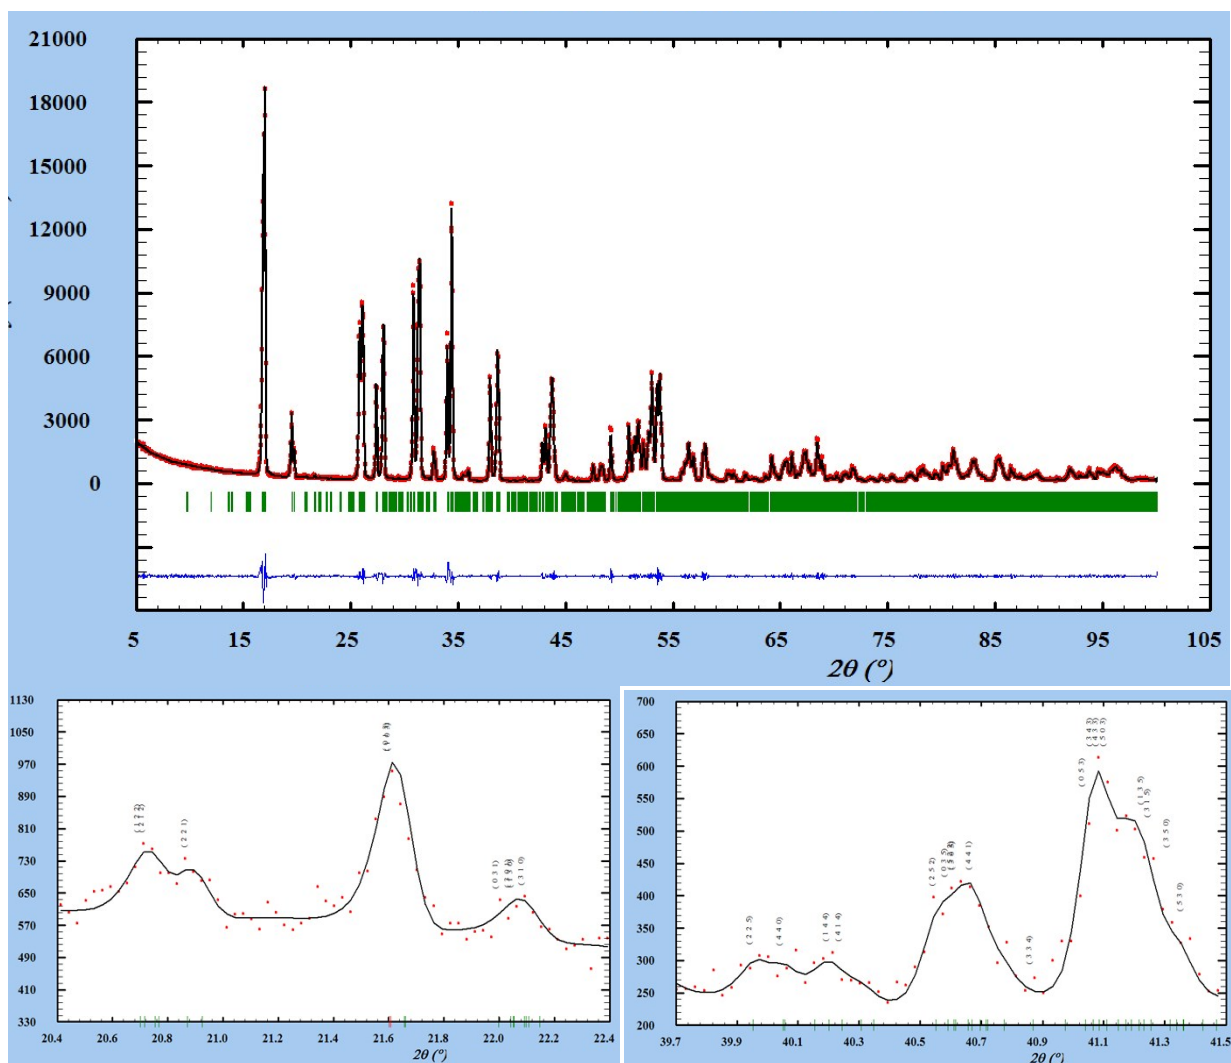

**Fig. S7.** Profile fit of the RT XRD pattern (t=3s, above) in the  $P2_12_12_1$  (#19) SG and selected regions measured with t=6s showing low intensity reflections (below).

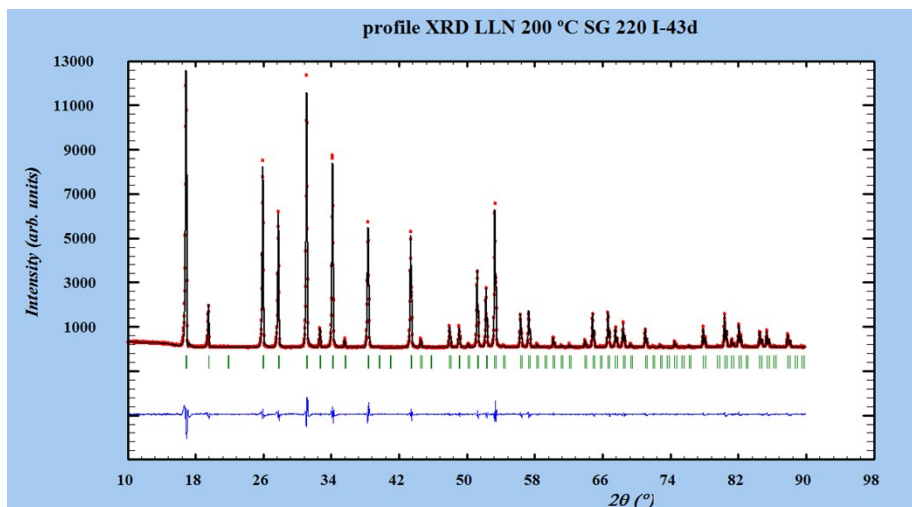

**Fig. S8.** Profile fit of the XRD pattern at 200 °C in the *I*-43d (#220) SG.  $\chi^2$ : 3.60.

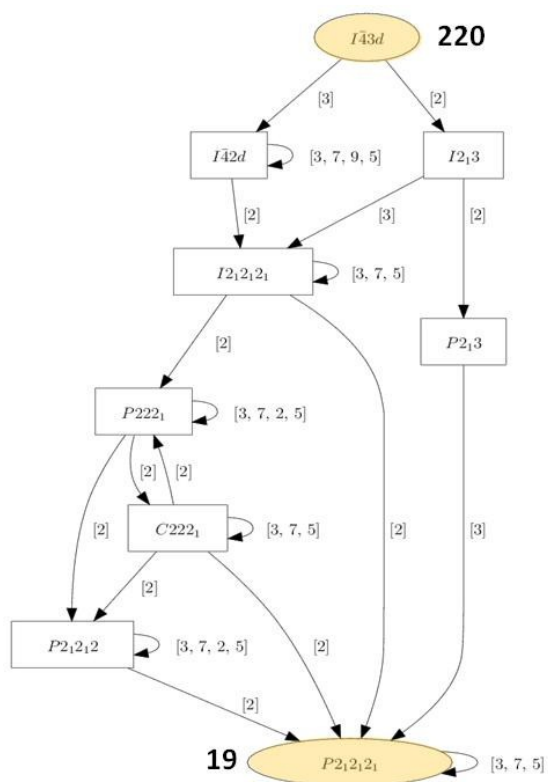

**Fig. S9:** Tree depicting the relation between the SGs of the high and low temperature phases of H-LLNO (*I*-43d and  $P2_12_12_1$ , respectively). Adapted from the Bilbao Crystallographic Server (ref. 23 in the main text).

**Table S1**

Relevant bond-distances in the low-temperature phase of H-LLNO derived from the fit of the RT PND in the  $P2_12_12_1$  SG.

|                  |                  |
|------------------|------------------|
| La1 - O1 : 2.47  | La5 - O7 : 2.55  |
| La1 - O3 : 2.58  | La5 - O9 : 2.63  |
| La1 - O10 : 2.54 | La5 - O16 : 2.44 |
| La1 - O11 : 2.51 | La5 - O17 : 2.45 |
| La1 - O13 : 2.55 | La5 - O19 : 2.48 |
| La1 - O15 : 2.51 | La5 - O21 : 2.44 |
| La1 - O22 : 2.66 | La6 - O5 : 2.56  |
| La1 - O23 : 2.58 | La6 - O6 : 2.48  |
|                  | La6 - O8 : 2.47  |
| La2 - O1 : 2.44  | La6 - O9 : 2.41  |
| La2 - O2 : 2.50  | La6 - O17 : 2.66 |
| La2 - O10 : 2.50 | La6 - O18 : 2.54 |
| La2 - O12 : 2.63 | La6 - O20 : 2.67 |
| La2 - O13 : 2.71 | La6 - O21 : 2.51 |
| La2 - O14 : 2.58 |                  |
| La2 - O22 : 2.43 | Nb1 - O10 : 2.11 |
| La2 - O24 : 2.54 | Nb1 - O11 : 2.31 |
|                  | Nb1 - O12 : 1.98 |
| La3 - O2 : 2.52  | Nb1 - O16 : 1.81 |
| La3 - O3 : 2.40  | Nb1 - O17 : 1.84 |
| La3 - O11 : 2.59 | Nb1 - O18 : 1.89 |
| La3 - O12 : 2.51 |                  |
| La3 - O14 : 2.57 | Nb2 - O1 : 1.84  |
| La3 - O15 : 2.47 | Nb2 - O2 : 1.84  |
| La3 - O23 : 2.54 | Nb2 - O3 : 2.02  |
| La3 - O24 : 2.42 | Nb2 - O19 : 2.23 |
|                  | Nb2 - O20 : 2.17 |
| La4 - O4 : 2.50  | Nb2 - O21 : 1.97 |
| La4 - O6 : 2.68  |                  |
| La4 - O7 : 2.63  | Nb3 - O4 : 1.90  |
| La4 - O8 : 2.54  | Nb3 - O5 : 1.92  |
| La4 - O16 : 2.45 | Nb3 - O6 : 2.05  |
| La4 - O18 : 2.40 | Nb3 - O22 : 2.13 |
| La4 - O19 : 2.46 | Nb3 - O23 : 2.15 |
| La4 - O20 : 2.45 | Nb3 - O24 : 1.87 |
|                  |                  |
| La5 - O4 : 2.74  | Nb4 - O7 : 2.16  |
| La5 - O5 : 2.54  | Nb4 - O8 : 2.13  |

Nb4 – O9 : 1.97  
Nb4 – O13 : 1.91  
Nb4 – O14: 1.87  
Nb4 – O15 : 1.97

Li1 - O1 : 1.824  
Li1 - O5 : 1.93  
Li1 - O13 : 1.90  
Li1 – O17 : 2.10

Li2 - O2 : 1.87  
Li2 - O4 : 2.19  
Li2 – O14 : 2.02  
Li2 – O16: 1.95

Li3 - O3 : 1.94  
Li3 - O6 : 1.87  
Li3 – O15 : 2.06  
Li3 – O18 : 2.06

Li4 - O7 : 2.00  
Li4 - O11 : 1.80  
Li4 – O19 : 1.96  
Li4 – O23 : 1.83

Li5 - O8 : 1.98  
Li5 - O10 : 1.80  
Li5 – O20 : 2.14  
Li5 – O22 : 1.89

Li6 - O9 : 2.01  
Li6 - O12 : 1.96  
Li6 – O21 : 2.00  
Li6 – O24: 2.19

H1 - O8 : 1.02  
H2 - O23 : 0.98  
H3 - O10: 1.03  
H4 - O20: 1.17  
H5 - O11 : 1.03  
H6 - O22 : 1.10  
H7 - O7 : 0.92  
H8 - O19: 0.90

H1 - H3 : 1.51  
H1 - H4 : 2.77  
H1 - H6 : 2.69  
H3 - H4 : 2.30  
H3 - H6 : 3.44

H2 - H5 : 2.41  
H2 - H7 : 1.88  
H2 - H8 : 1.89  
H5 - H7 : 1.76  
H5 - H8 : 2.04



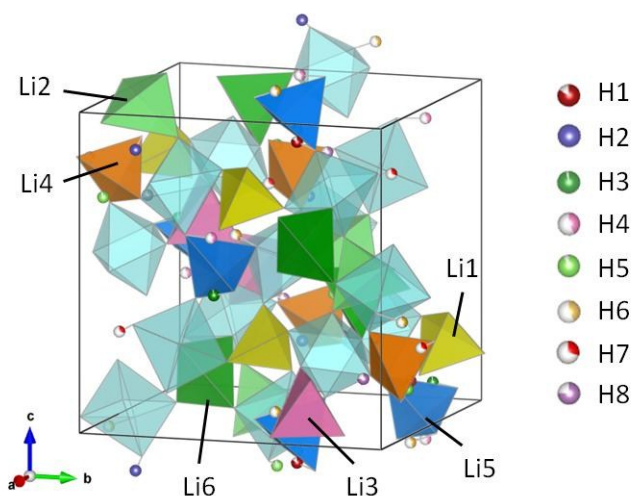

**Fig. S10.** Unit cell resulting from fitting the RT PND pattern with the  $P2_12_12_1$  SG. Atom coordinates and occupancies are given in Table 1 of the main text.

**Table S2.** Relevant distances in the high temperature phase of H-LLNO derived from the fit of the 200 °C PND in the  $I-43d$  SG.

|                         |                 |
|-------------------------|-----------------|
| La1 - O1 : 2.57 x2      | Li3 - O1 : 2.28 |
| La1 - O1 : 2.56 x2      | Li3 - O1 : 1.82 |
| La1 - O2 : 2.44 x2      | Li3 - O1 : 2.43 |
| La1 - O2 : 2.58 x2      | Li3 - O2 : 2.51 |
|                         | Li3 - O2 : 2.61 |
| Nb1 - O1 : 2.07 x3      | Li3 - O2 : 2.11 |
| Nb1 - O2 : 1.94 x3      |                 |
|                         | H1 - O1 : 0.94  |
| Li1(12b) - O1 : 1.93 x4 |                 |
| Li2(12a) - O2 : 1.99 x4 |                 |

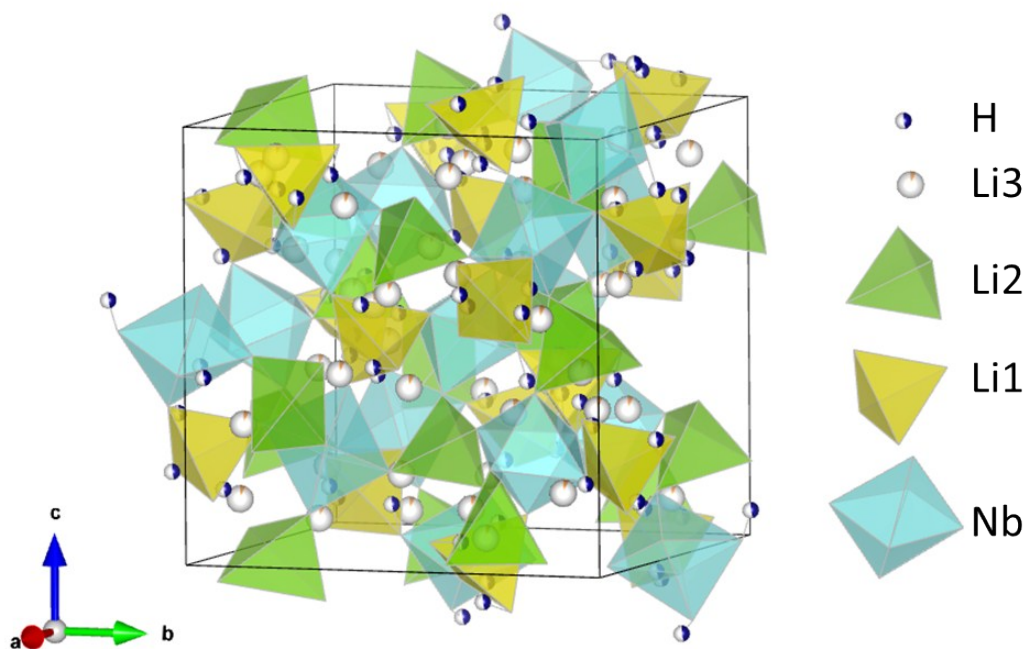

**Fig. S11.** Unit cell of the high temperature phase ( $I-43d$  SG), showing Li1 and Li2 tetrahedra, Nb octahedra and H bonding to Li1 tetrahedra. Large spheres represent octahedral Li ions (Li3).

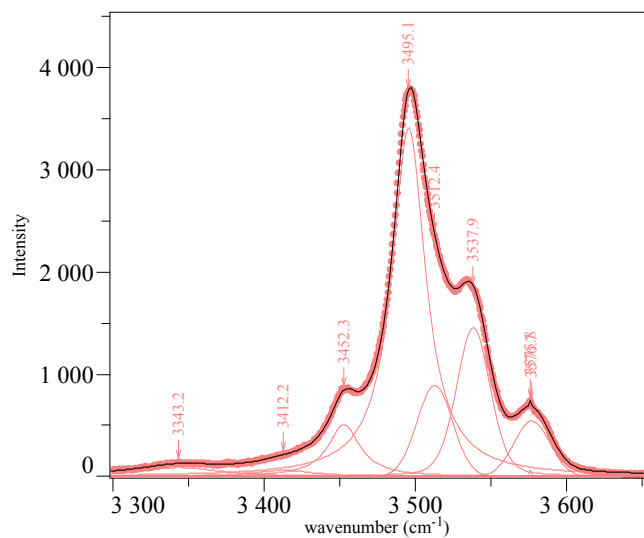

**Fig. S12.** Profile decomposition of the OH<sup>-</sup> stretching region of the RT Raman spectrum.

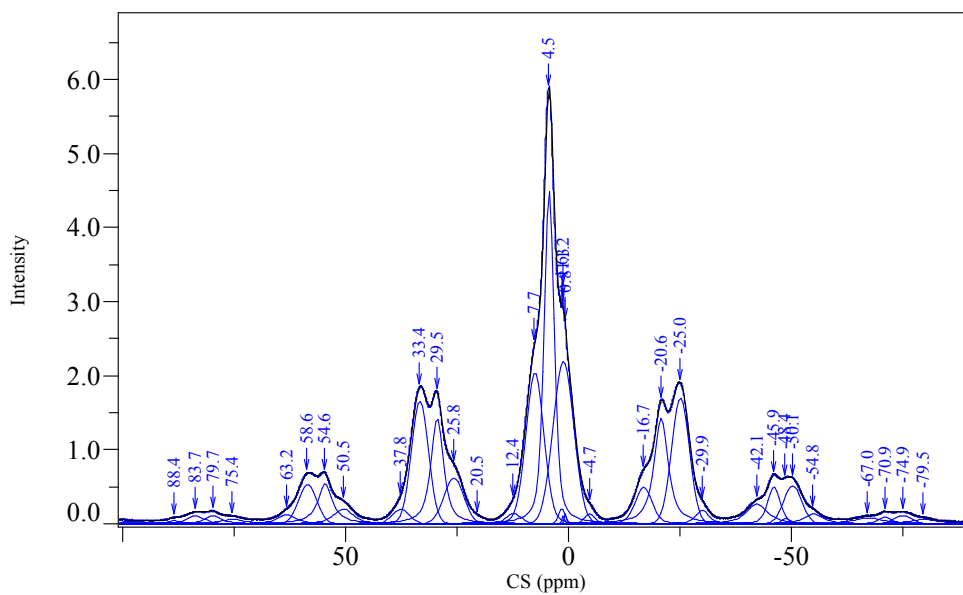

**Fig. S13.** Profile decomposition of the <sup>1</sup>H MAS-NMR spectrum ( $\nu_r = 10$  KHz).
